# Supplementary material
Source: PubMed Central journal article supplement (PMC6710316)
Supplement: 13205_2019_1875_MOESM1_ESM.pdf [file 13205_2019_1875_MOESM1_ESM.pdf]

**Online Resource 1: Primers used for qRT-PCR analysis of genes encoding B3 domain containing proteins**

|           |                                                                  |
|-----------|------------------------------------------------------------------|
| CarB3_2   | FP: ACCACAGAATCACTTTCGATATCAAT<br>RP: CACGGCAGAGACTGTTTGGA       |
| CarB3_4   | FP: TCAAGGTTCTGATCCACTTGGAA<br>RP: CTGTCTCCTATCAGACGATGCATT      |
| CarB3_5   | FP: GCCGTCCGATTGGTTCAG<br>RP: GCACATTGGGAGACACAACCT              |
| CarB3_7   | FP: GCAGAGGAAGGGAGTGATGAAGT<br>RP: TCCTTCCCGAATGTTTTGCT          |
| CarB3_11  | FP: TCGGAAGATGCATTGATGTGA<br>RP: CCGAACATACGAGCCAAATCAT          |
| CarB3_14  | FP: TCCATCACTATTTCCCTTCGA<br>RP: CCCTTCGTCTCTGCCATCAA            |
| CarB3_20  | FP: TTGGAAGCAGGTGACATTGTTT<br>RP: GGCCTCCAATCTATGTACAACCTATG     |
| CarB3_21  | FP: CCGAAATCGTCGACATGCT<br>RP: GCCGCGCATGCTCTGT                  |
| CarB3_26  | FP: GCTTTTTCATCCCCATTTCT<br>RP: TTGCGAAGCGTAACTTCTGTTTT          |
| CarB3_28  | FP: TGAGACCGACCCTACAGCTGAT<br>RP: GGCGGCATAAACAGATTTC            |
| CarB3_34  | FP: CGAGTCAAGTGCTGGACAGATAGA<br>RP: GGACATGCTAAGTTTCGCGTTA       |
| CarB3_39  | FP: ATCCCCGGATTCTTCTTCTTA<br>RP: ACCCTCGGAAACCCACTTG             |
| CarB3_41  | FP: TGCAGAACATGCCAAGGATAAA<br>RP: TTGGGCCCTAATCGATGTAGTT         |
| CarB3_46  | FP: CACCCTCGGTTCAACCTACAG<br>RP: GTGTCAACATCGGGAACCTCAC          |
| CarB3_49  | FP: GACGCCGAAGAGACTAGAAGATATTT<br>RP: CATTCCACATTGTTTATTTTCATCGT |
| EF1 alpha | FP: TCCACCACTGGTCGTTTTG<br>RP: CTTAATGACACCGACAGCAACAG           |
