# Supplementary material
Source: PubMed Central journal article supplement (PMC6710316)
Supplement: 13205_2019_1875_MOESM2_ESM.pdf [file 13205_2019_1875_MOESM2_ESM.pdf]

**Online Resource 2: Domains with their positions in chickpea B3 proteins.**

| Gene_Id  | From | To  | E-Value  | Accession  | Domain short name   |
|----------|------|-----|----------|------------|---------------------|
| CarB3_1  | 69   | 173 | 2.46E-34 | pfam02362  | B3                  |
| CarB3_2  | 198  | 308 | 9.16E-32 | pfam02362  | B3                  |
| CarB3_2  | 66   | 126 | 1.34E-25 | smart00380 | AP2                 |
| CarB3_3  | 319  | 420 | 7.67E-22 | cd10017    | B3                  |
| CarB3_3  | 592  | 634 | 3.60E-12 | pfam07496  | zf-CW               |
| CarB3_4  | 640  | 741 | 8.67E-37 | cd10015    | B3                  |
| CarB3_5  | 130  | 212 | 1.28E-37 | pfam06507  | Auxin_resp          |
| CarB3_5  | 10   | 70  | 1.08E-18 | pfam02362  | B3                  |
| CarB3_6  | 310  | 406 | 8.06E-19 | cd10017    | B3                  |
| CarB3_6  | 541  | 583 | 1.86E-15 | pfam07496  | zf-CW               |
| CarB3_7  | 267  | 348 | 1.95E-46 | pfam06507  | Auxin_resp          |
| CarB3_7  | 152  | 243 | 4.28E-20 | pfam02362  | B3                  |
| CarB3_8  | 266  | 343 | 5.14E-44 | pfam06507  | Auxin_resp          |
| CarB3_8  | 127  | 236 | 2.36E-28 | pfam02362  | B3                  |
| CarB3_8  | 769  | 856 | 8.89E-09 | cl03528    | AUX_IAA superfamily |
| CarB3_9  | 290  | 367 | 6.14E-43 | pfam06507  | Auxin_resp          |
| CarB3_9  | 111  | 212 | 1.28E-27 | pfam02362  | B3                  |
| CarB3_10 | 273  | 354 | 1.09E-40 | pfam06507  | Auxin_resp          |
| CarB3_10 | 182  | 248 | 1.14E-17 | pfam02362  | B3                  |
| CarB3_10 | 678  | 742 | 6.99E-05 | cl03528    | AUX_IAA superfamily |
| CarB3_11 | 257  | 334 | 3.95E-44 | pfam06507  | Auxin_resp          |
| CarB3_11 | 126  | 228 | 1.79E-25 | pfam02362  | B3                  |
| CarB3_11 | 715  | 787 | 7.85E-08 | cl03528    | AUX_IAA superfamily |
| CarB3_12 | 314  | 415 | 1.18E-21 | cd10017    | B3                  |
| CarB3_13 | 528  | 619 | 2.14E-22 | cd10017    | B3                  |
| CarB3_14 | 260  | 337 | 1.23E-43 | pfam06507  | Auxin_resp          |
| CarB3_14 | 128  | 230 | 3.04E-28 | pfam02362  | B3                  |
| CarB3_14 | 706  | 778 | 1.24E-06 | cl03528    | AUX_IAA superfamily |
| CarB3_15 | 112  | 211 | 1.42E-24 | pfam02362  | B3                  |
| CarB3_15 | 250  | 328 | 3.72E-19 | pfam06507  | Auxin_resp          |
| CarB3_16 | 241  | 322 | 7.35E-40 | pfam06507  | Auxin_resp          |
| CarB3_16 | 115  | 214 | 7.23E-26 | pfam02362  | B3                  |
| CarB3_16 | 359  | 428 | 2.95E-06 | cl03528    | AUX_IAA superfamily |
| CarB3_17 | 124  | 225 | 1.11E-21 | cd10017    | B3                  |
| CarB3_18 | 138  | 240 | 5.28E-24 | cd10017    | B3                  |
| CarB3_19 | 45   | 147 | 2.40E-34 | pfam02362  | B3                  |
| CarB3_20 | 110  | 199 | 2.66E-30 | pfam02362  | B3                  |
| CarB3_21 | 190  | 290 | 2.12E-28 | pfam02362  | B3                  |
| CarB3_21 | 61   | 122 | 8.58E-26 | smart00380 | AP2                 |

|          |     |     |             |            |                     |
|----------|-----|-----|-------------|------------|---------------------|
| CarB3_22 | 265 | 348 | 1.09E-44    | pfam06507  | Auxin_resp          |
| CarB3_22 | 116 | 205 | 5.93E-23    | pfam02362  | B3                  |
| CarB3_23 | 296 | 379 | 1.82E-41    | pfam06507  | Auxin_resp          |
| CarB3_23 | 130 | 231 | 2.28E-25    | pfam02362  | B3                  |
| CarB3_24 | 298 | 393 | 6.82E-23    | cd10017    | B3                  |
| CarB3_24 | 4   | 96  | 3.44E-18    | cd10017    | B3                  |
| CarB3_25 | 101 | 206 | 5.50E-16    | cd10017    | B3                  |
| CarB3_26 | 215 | 309 | 2.77E-19    | cd10017    | B3                  |
| CarB3_26 | 444 | 538 | 4.00E-18    | cd10017    | B3                  |
| CarB3_26 | 9   | 66  | 4.01E-13    | cd10017    | B3                  |
| CarB3_27 | 26  | 115 | 2.86E-18    | cd10017    | B3                  |
| CarB3_28 | 21  | 110 | 3.72E-20    | cd10017    | B3                  |
| CarB3_28 | 301 | 384 | 3.31E-14    | cd10017    | B3                  |
| CarB3_29 | 224 | 279 | 6.14E-22    | pfam06507  | Auxin_resp          |
| CarB3_29 | 118 | 198 | 1.97E-14    | smart01019 | B3                  |
| CarB3_30 | 208 | 290 | 6.96E-14    | pfam02362  | B3                  |
| CarB3_31 | 280 | 357 | 4.78E-42    | pfam06507  | Auxin_resp          |
| CarB3_31 | 148 | 250 | 1.81E-28    | pfam02362  | B3                  |
| CarB3_31 | 823 | 895 | 3.98E-12    | cl03528    | AUX_IAA superfamily |
| CarB3_32 | 3   | 78  | 3.54E-10    | cd10017    | B3                  |
| CarB3_32 | 156 | 222 | 1.16E-09    | cd10017    | B3                  |
| CarB3_33 | 1   | 91  | 3.90E-08    | cl15242    | B3                  |
| CarB3_33 | 156 | 220 | 0.000425437 | cl15242    | B3                  |
| CarB3_34 | 270 | 371 | 3.65E-24    | cd10017    | B3                  |
| CarB3_34 | 542 | 584 | 6.87E-15    | pfam07496  | zf-CW               |
| CarB3_35 | 262 | 339 | 9.28E-44    | pfam06507  | Auxin_resp          |
| CarB3_35 | 130 | 232 | 5.34E-28    | pfam02362  | B3                  |
| CarB3_36 | 128 | 219 | 3.47E-26    | cd10017    | B3                  |
| CarB3_37 | 16  | 119 | 1.62E-10    | cd10017    | B3                  |
| CarB3_37 | 394 | 473 | 3.10E-09    | pfam02362  | B3                  |
| CarB3_38 | 241 | 318 | 2.10E-43    | pfam06507  | Auxin_resp          |
| CarB3_38 | 140 | 206 | 1.20E-12    | pfam02362  | B3                  |
| CarB3_39 | 242 | 324 | 2.95E-49    | pfam06507  | Auxin_resp          |
| CarB3_39 | 116 | 217 | 3.68E-27    | pfam02362  | B3                  |
| CarB3_39 | 698 | 773 | 2.17E-08    | cl03528    | AUX_IAA superfamily |
| CarB3_40 | 258 | 335 | 2.06E-44    | pfam06507  | Auxin_resp          |
| CarB3_40 | 126 | 228 | 3.26E-28    | pfam02362  | B3                  |
| CarB3_40 | 771 | 858 | 1.27E-06    | cl03528    | AUX_IAA superfamily |
| CarB3_41 | 116 | 211 | 1.50E-16    | cd10017    | B3                  |
| CarB3_42 | 274 | 355 | 1.86E-42    | pfam06507  | Auxin_resp          |
| CarB3_42 | 148 | 249 | 2.15E-29    | pfam02362  | B3                  |

|          |     |     |          |           |                     |
|----------|-----|-----|----------|-----------|---------------------|
| CarB3_43 | 48  | 111 | 2.92E-13 | pfam02362 | B3                  |
| CarB3_44 | 298 | 380 | 7.56E-44 | pfam06507 | Auxin_resp          |
| CarB3_44 | 172 | 274 | 1.07E-27 | pfam02362 | B3                  |
| CarB3_44 | 683 | 758 | 1.29E-05 | cl03528   | AUX_IAA superfamily |
| CarB3_45 | 279 | 362 | 5.21E-46 | pfam06507 | Auxin_resp          |
| CarB3_45 | 108 | 209 | 3.77E-27 | pfam02362 | B3                  |
| CarB3_46 | 226 | 307 | 2.27E-41 | pfam06507 | Auxin_resp          |
| CarB3_46 | 103 | 200 | 4.76E-26 | pfam02362 | B3                  |
| CarB3_46 | 578 | 664 | 5.69E-12 | cl03528   | AUX_IAA superfamily |
| CarB3_47 | 295 | 390 | 2.14E-22 | cd10017   | B3                  |
| CarB3_47 | 4   | 96  | 4.03E-19 | cd10017   | B3                  |
| CarB3_48 | 258 | 334 | 1.08E-44 | pfam06507 | Auxin_resp          |
| CarB3_48 | 126 | 228 | 1.35E-24 | pfam02362 | B3                  |
| CarB3_48 | 875 | 947 | 2.01E-07 | cl03528   | AUX_IAA superfamily |
| CarB3_49 | 115 | 187 | 5.46E-17 | cd10017   | B3                  |
| CarB3_50 | 279 | 361 | 1.89E-31 | pfam06507 | Auxin_resp          |
| CarB3_50 | 117 | 219 | 1.96E-21 | pfam02362 | B3                  |
| CarB3_51 | 256 | 336 | 3.80E-43 | pfam06507 | Auxin_resp          |
| CarB3_51 | 130 | 230 | 2.21E-27 | pfam02362 | B3                  |
| CarB3_51 | 564 | 648 | 6.50E-08 | cl03528   | AUX_IAA superfamily |
