# Supplementary material
Source: PubMed Central journal article supplement (PMC6710316)
Supplement: 13205_2019_1875_MOESM3_ESM.pdf [file 13205_2019_1875_MOESM3_ESM.pdf]

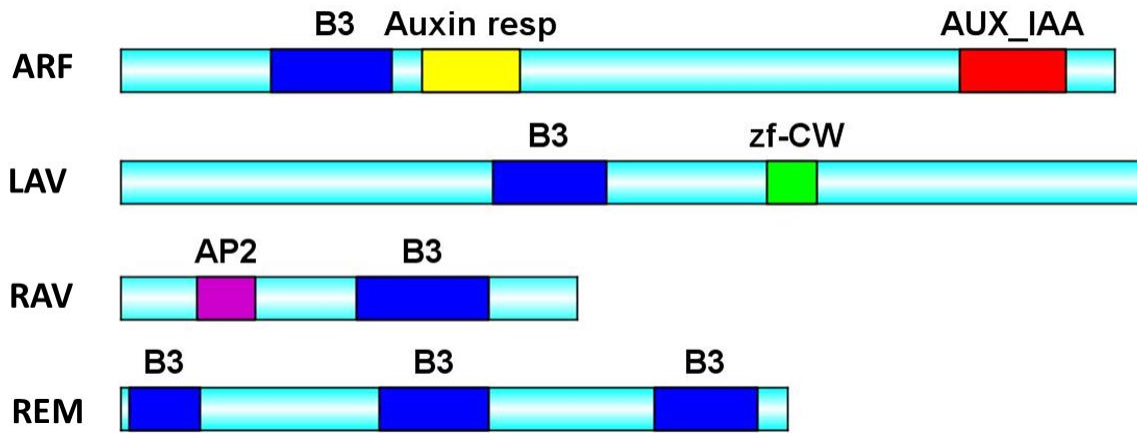

**Online Resource 3:** Schematic representation of domain composition of different families of B3 superfamily.
