# Supplementary material
Source: PubMed Central journal article supplement (PMC6710316)
Supplement: 13205_2019_1875_MOESM4_ESM.pdf [file 13205_2019_1875_MOESM4_ESM.pdf]

#### Online Resource 4: Segmental and tandem duplicated gene pairs

| <b>Segmental duplicated gene pairs</b> |          | <b>Tandem duplicated gene pairs</b> |          |
|----------------------------------------|----------|-------------------------------------|----------|
| CarB3_7                                | CarB3_42 | CarB3_19                            | CarB3_20 |
| CarB3_9                                | CarB3_22 | CarB3_22                            | CarB3_23 |
| CarB3_9                                | CarB3_23 | CarB3_30                            | CarB3_31 |
| CarB3_9                                | CarB3_45 | CarB3_29                            | CarB3_30 |
| CarB3_10                               | CarB3_44 | CarB3_27                            | CarB3_28 |
| CarB3_11                               | CarB3_48 | CarB3_26                            | CarB3_27 |
| CarB3_12                               | CarB3_17 | CarB3_32                            | CarB3_33 |
| CarB3_12                               | CarB3_34 |                                     |          |
| CarB3_14                               | CarB3_35 |                                     |          |
| CarB3_17                               | CarB3_34 |                                     |          |
| CarB3_23                               | CarB3_45 |                                     |          |
| CarB3_24                               | CarB3_47 |                                     |          |
| CarB3_26                               | CarB3_47 |                                     |          |
| CarB3_36                               | CarB3_49 |                                     |          |
