# Supplementary material
Source: PubMed Central journal article supplement (PMC6710316)
Supplement: 13205_2019_1875_MOESM5_ESM.pdf [file 13205_2019_1875_MOESM5_ESM.pdf]

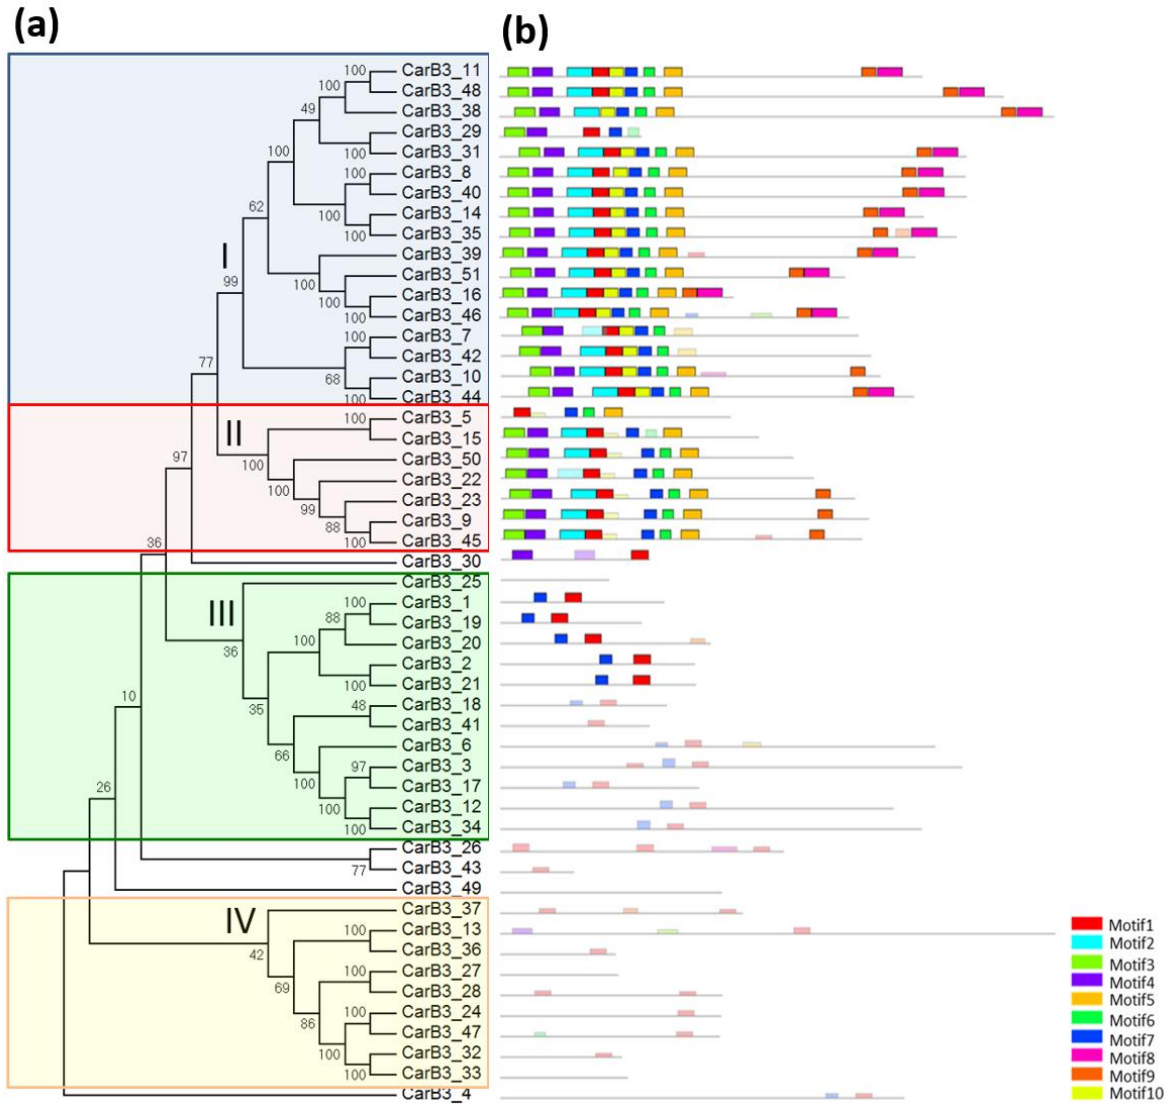

**Online Resource 5:** Phylogenetic classification of CarB3 members. Illustration of discovered conserved motifs in CarB3 proteins.
