# Supplementary material
Source: PubMed Central journal article supplement (PMC6710316)
Supplement: 13205_2019_1875_MOESM6_ESM.pdf [file 13205_2019_1875_MOESM6_ESM.pdf]

**Online Resource 6: Specific conserved motifs identified by MEME among B3 proteins in chickpea**

| Motif | Motif logo | E-value  | Sites | Width |
|-------|------------|----------|-------|-------|
| 1     |            | 2.7e-571 | 29    | 33    |
| 2     |            | 7.0e-625 | 20    | 50    |
| 3     |            | 4.7e-470 | 23    | 41    |
| 4     |            | 1.7e-395 | 24    | 40    |
| 5     |            | 4.1e-349 | 21    | 36    |
| 6     |            | 6.0e-215 | 22    | 22    |
| 7     |            | 1.4e-208 | 29    | 25    |
| 8     |            | 1.1e-308 | 13    | 50    |
| 9     |            | 1.1e-182 | 17    | 29    |
| 10    |            | 4.5e-164 | 16    | 29    |
