# Supplementary material
Source: PubMed Central journal article supplement (PMC6710316)
Supplement: 13205_2019_1875_MOESM7_ESM.pdf [file 13205_2019_1875_MOESM7_ESM.pdf]

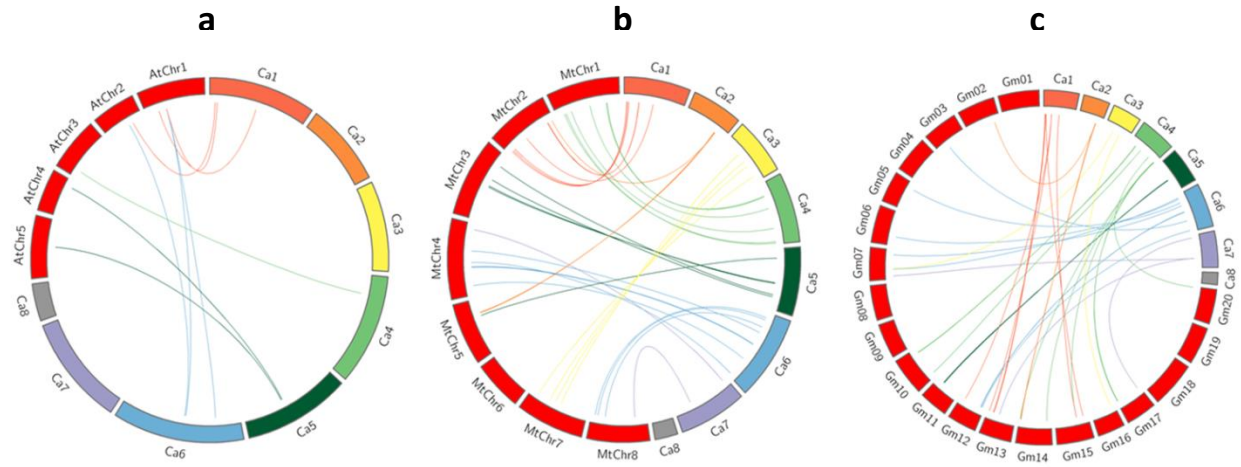

**Online Resource 7:** Comparative analysis for synteny of CarB3 genes with their homologs from (a) *A. thaliana* (b) *M. truncatula*, and (c) *G. max*.
