# Supplementary material
Source: PubMed Central journal article supplement (PMC6710316)
Supplement: 13205_2019_1875_MOESM8_ESM.pdf [file 13205_2019_1875_MOESM8_ESM.pdf]

## Online Resource 8: Homologous gene pairs and their Ka/Ks values

| <b>Chickpea-Arabidopsis</b> |                 |             |             |              |
|-----------------------------|-----------------|-------------|-------------|--------------|
| <b>Ca_ID</b>                | <b>At_ID</b>    | <b>Ka</b>   | <b>Ks</b>   | <b>Ka/Ks</b> |
| CarB3_8                     | AT1G30330.2     | 0.16        | 1.65        | 0.10         |
| CarB3_48                    | AT1G19220.1     | 0.22        | 2.51        | 0.09         |
| CarB3_40                    | AT1G30330.2     | 0.19        | 2.17        | 0.09         |
| CarB3_11                    | AT1G19220.1     | 0.16        | 2.89        | 0.05         |
| CarB3_48                    | AT5G20730.1     | 0.24        | 2.36        | 0.10         |
| CarB3_35                    | AT1G30330.2     | 0.38        | 5.48        | 0.07         |
| CarB3_11                    | AT5G20730.1     | 0.16        | 2.14        | 0.07         |
|                             | <b>Average</b>  | <b>0.22</b> | <b>2.74</b> | <b>0.08</b>  |
| <b>Chickpea-Glycine max</b> |                 |             |             |              |
| CarB3_48                    | Glyma17g05220.1 | 0.07        | 0.42        | 0.16         |
| CarB3_11                    | Glyma09g08350.1 | 0.05        | 0.55        | 0.10         |
| CarB3_11                    | Glyma15g19980.2 | 0.06        | 0.54        | 0.11         |
| CarB3_48                    | Glyma09g08350.1 | 0.09        | 0.55        | 0.16         |
| CarB3_48                    | Glyma15g19980.2 | 0.09        | 0.53        | 0.18         |
| CarB3_11                    | Glyma17g05220.1 | 0.07        | 0.70        | 0.10         |
| CarB3_14                    | Glyma05g27580.1 | 0.31        | 4.24        | 0.07         |
| CarB3_14                    | Glyma02g40650.1 | 0.05        | 0.41        | 0.13         |
| CarB3_8                     | Glyma15g09750.2 | 0.05        | 0.49        | 0.11         |
| CarB3_16                    | Glyma03g17450.1 | 0.08        | 0.96        | 0.08         |
| CarB3_35                    | Glyma05g27580.1 | 0.37        | 3.85        | 0.10         |
| CarB3_16                    | Glyma01g25270.5 | 0.08        | 1.02        | 0.08         |
| CarB3_8                     | Glyma13g29320.1 | 0.06        | 0.52        | 0.12         |
| CarB3_16                    | Glyma01g25270.5 | 0.08        | 1.02        | 0.08         |
| CarB3_16                    | Glyma18g40180.1 | 0.08        | 0.56        | 0.14         |
| CarB3_14                    | Glyma18g05330.1 | 0.07        | 0.56        | 0.13         |
| CarB3_16                    | Glyma03g17450.1 | 0.08        | 0.96        | 0.08         |
| CarB3_35                    | Glyma18g05330.1 | 0.05        | 0.41        | 0.13         |
| CarB3_40                    | Glyma08g10550.1 | 0.08        | 0.51        | 0.15         |
| CarB3_6                     | Glyma13g31970.1 | 0.07        | 0.44        | 0.15         |
| CarB3_3                     | Glyma03g04330.2 | 0.08        | 0.40        | 0.20         |
| CarB3_6                     | Glyma15g07350.1 | 0.07        | 0.44        | 0.15         |
| CarB3_39                    | Glyma08g01100.1 | 0.09        | 0.84        | 0.10         |
| CarB3_40                    | Glyma15g09750.2 | 0.08        | 0.58        | 0.14         |
| CarB3_39                    | Glyma05g38540.5 | 0.09        | 0.82        | 0.11         |
| CarB3_40                    | Glyma13g29320.1 | 0.08        | 0.64        | 0.13         |
| CarB3_8                     | Glyma08g10550.1 | 0.08        | 0.63        | 0.13         |
| CarB3_11                    | Glyma09g08350.1 | 0.05        | 0.55        | 0.10         |
| CarB3_35                    | Glyma02g40650.1 | 0.07        | 0.54        | 0.14         |

|                              |                 |             |             |             |
|------------------------------|-----------------|-------------|-------------|-------------|
| CarB3_31                     | Glyma17g37580.1 | 0.08        | 0.60        | 0.13        |
| CarB3_11                     | Glyma15g19980.2 | 0.06        | 0.54        | 0.11        |
| CarB3_40                     | Glyma05g27580.1 | 0.07        | 0.48        | 0.14        |
|                              | <b>Average</b>  | <b>0.09</b> | <b>0.82</b> | <b>0.12</b> |
| <b>Chickpea and Medicago</b> |                 |             |             |             |
| CarB3_14                     | Medtr5g076270.1 | 0.03        | 0.25        | 0.14        |
| CarB3_48                     | Medtr4g124900.1 | 0.06        | 0.28        | 0.22        |
| CarB3_8                      | Medtr2g018690.1 | 0.04        | 0.32        | 0.13        |
| CarB3_3                      | Medtr4g028130.1 | 0.05        | 0.30        | 0.18        |
| CarB3_35                     | Medtr3g064050.1 | 0.03        | 0.24        | 0.14        |
| CarB3_6                      | Medtr2g011940.1 | 0.05        | 0.29        | 0.17        |
| CarB3_2                      | Medtr5g053920.1 | 0.06        | 0.66        | 0.10        |
| CarB3_11                     | Medtr4g124900.1 | 0.08        | 0.83        | 0.10        |
| CarB3_26                     | Medtr1g021270.1 | 0.07        | 0.25        | 0.29        |
| CarB3_7                      | Medtr2g014770.1 | 0.06        | 0.29        | 0.23        |
| CarB3_39                     | Medtr8g100050.1 | 0.05        | 0.47        | 0.11        |
| CarB3_44                     | Medtr4g060460.1 | 0.09        | 0.37        | 0.25        |
| CarB3_48                     | Medtr4g124900.1 | 0.06        | 0.28        | 0.22        |
| CarB3_47                     | Medtr4g068320.1 | 0.09        | 0.40        | 0.23        |
| CarB3_21                     | Medtr1g093600.1 | 0.09        | 0.32        | 0.28        |
| CarB3_36                     | Medtr3g101520.1 | 0.11        | 0.41        | 0.26        |
| CarB3_14                     | Medtr3g064050.1 | 0.09        | 0.61        | 0.15        |
| CarB3_5                      | Medtr3g073420.1 | 0.09        | 0.50        | 0.18        |
| CarB3_26                     | Medtr1g021360.1 | 0.73        | 1.71        | 0.43        |
| CarB3_9                      | Medtr2g094570.1 | 0.07        | 0.46        | 0.16        |
| CarB3_38                     | Medtr8g101360.1 | 0.09        | 0.31        | 0.28        |
|                              | <b>Average</b>  | <b>0.10</b> | <b>0.45</b> | <b>0.20</b> |
| <b>Chickpea-chickpea</b>     |                 |             |             |             |
| CarB3_29                     | CarB3_30        | 0.5146      | 0.6826      | 0.753882215 |
| CarB3_11                     | CarB3_48        | 0.0919      | 0.7909      | 0.116196738 |
| CarB3_8                      | CarB3_40        | 0.0957      | 0.7621      | 0.125574072 |
|                              | <b>Average</b>  | <b>0.23</b> | <b>0.74</b> | <b>0.33</b> |
