# Supplementary material
Source: PubMed Central journal article supplement (PMC6710316)
Supplement: 13205_2019_1875_MOESM9_ESM.pdf [file 13205_2019_1875_MOESM9_ESM.pdf]

## Online Resource 9: Details of some of the motifs found in the promoter sequences of CarB3 genes

| Motifs           | Motif sequence | Brief description of motif                                                                                                    | CarB3 genes containing motifs                                                                                 |
|------------------|----------------|-------------------------------------------------------------------------------------------------------------------------------|---------------------------------------------------------------------------------------------------------------|
| 2SSEEDPROTBANAPA | CAAACAC        | Conserved in many SSP gene promoters                                                                                          | CarB3_5,7,10,14,15,16,18,20,22,23,28,30,31,32,33,34,39,45,48,49                                               |
| -300CORE         | TGTAAAG        | Present in alpha-zein genes of maize                                                                                          | CarB3_4,5,20,22,24,25,26,32,38,39,43,47                                                                       |
| -300ELEMENT      | TGAAAAAA       | Elements found in the promoter of barley hordein, and gliadins, glutenin genes of wheat                                       | CarB3_5,6,7,8,11,12,13,15,16,24,27,28,29,32,34,37,38,39,41,42,44,45,48,50,51                                  |
| AACACOREOSGLUB1  | AACAAAC        | Found in oryza glutelin genes; Involved in conferring endosperm-specific expression                                           | CarB3_1,3,4,5,6,7,8,9,10,12,13,15,16,17,18,21,22,23,24,25,26,28,29,30,32,34,35,36,38,39,40,41,44,46,47,48,50, |
| ABRELATERD1      | ACGTG          | Element found in erd1 (early responsive to dehydration); required for dehydration stress and for etiolated-induced senescence | CaB3_1,2,5,7,8,12,14,16,18,19,20,21,23,28,29,31,33,34,35,36,37,39,44,45,47,48,49,50,51                        |
| ACGTATERD1       | ACGT           | -do-                                                                                                                          | All except CarB3_4,24,43                                                                                      |
| AMYBOX1          | TAACAAA        | Cis-elements present in the 5'-upstream region of $\alpha$ -amylase gene family of rice, wheat, barley                        | CaB3_1,3,7,8,9,10,13,14,15,17,18,19,21,22,23,24,26,28,29,30,31,34,35,36,37,38,41,45,46,47,49,50,51            |
| AMYBOX2          | TATCCAT        | Present in the $\alpha$ -amylase gene of rice, barley and wheat                                                               | CarB3_1,2,3,4,5,16,23,32,36,41,41,43,47                                                                       |
| ARFAT            | TGTCTC         | ARF binding site, found in the promoters of genes up-regulated by auxin hormone                                               | CaB3_1,4,5,9,11,12,14,15,16,19,21,23,25,27,28,30,31,32,33,34,37,38,39,42,43,44,45,46,48,50,51                 |
| CBFHV            | AACGAC         | Binding site of DREBs, dehydration responsive element binding proteins                                                        | CaB3_3,6,7,13,14,15,18,20,25,26,33,34,38,39,40,42,43,45,46,47,48,51                                           |
| DRECRTCOREAT     | ACCGAC         | Core motif of DRE/CRT (dehydration-responsive element/C-repeat) cis-acting element found in many genes in <i>Arabidopsis</i>  | CarB3_13,17,33,43,44,45,50                                                                                    |
| GBOXLERBCS       | ACACGTGGC      | Required for light-regulated gene expression                                                                                  | CarB3_23                                                                                                      |
| GCCCORE          | GCCGCC         | Core of GCC-box found in many pathogen-responsive genes and has been shown to function as ethylene-responsive element         | CarB3_3,5,23,38,39,40                                                                                         |
| GCN4OSGLUB1      | TGAGTCA        | Found in the rice GluB-1 gene and required for endosperm specific                                                             | CarB3_16,20,21,22,23,38,42,43,47,50                                                                           |

|                               |                  |                                                                                                                                       |                                                                                                                                                       |
|-------------------------------|------------------|---------------------------------------------------------------------------------------------------------------------------------------|-------------------------------------------------------------------------------------------------------------------------------------------------------|
|                               |                  | expression                                                                                                                            |                                                                                                                                                       |
| MYB1AT                        | AAACCA           | Cis-acting elements present in the promoters of dehydration-responsive gene ( <i>Atrd22</i> ) and serve as binding site for MYB TF.   | All except CarB3_2,5,6,13,22,23,24                                                                                                                    |
| MYBATRD22                     | CTAACCA          | MYB binding site in <i>Atrd22</i> gene                                                                                                | CarB3_11,15,18,20,21,26,35,39,40,44,45                                                                                                                |
| MYB2CONSENSUSAT               | AAACAG           | MYB recognition site found in the promoters of the dehydration-responsive gene <i>rd22</i> and many other genes in <i>Arabidopsis</i> | CarB3_1,2,4,5,7,8,9,10,12,13,15,16,18,19,20,23,24,25,26,27,29,30,31,32,33,34,36,38,39,40,41,42,43,44,45,46,47,                                        |
| NAPINMOTIFBN                  | TACACAT          | Element found in 5' upstream region of napin gene                                                                                     | CaB3_2,3,5,13,17,24,27,29,31,32,33,34,37,40,41,51                                                                                                     |
| RAV1BAT                       | CAACA            | Binding consensus sequence of AtRAV1                                                                                                  | CarB3_1,2,3,4,5,6,7,8,9,10,11,12,13,14,15,16,17,18,19,20,21,22,23,24,25,26,27,28,29,30,31,32,33,34,35,36,37,38,39,40,41,42,43,44,45,46,47,48,49,50,51 |
| RYREPEATBNNAPA                | CATGCA           | Observed in the "RY/G box" of napin promoter. Required for seed specific expression                                                   | All except CarB3_6,7,8,11,14,15,16,17,19,22,23,24,25,29,30,37,41,44,45,47,50,51                                                                       |
| SEF1MOTIF                     | ATATTTAAA        | Element found in 5' upstream region of $\beta$ -conglycinin gene                                                                      | 1,4,5,9,10,15,16,19,21,22,24,25,28,29,31,35,36,37,39,44,48,49                                                                                         |
| SEF3MOTIFGM                   | AACCCA           | Element found in 5' upstream region of $\beta$ -conglycinin gene                                                                      | 2,4,6,7,8,9,13,14,15,16,17,18,19,22,23,25,26,27,28,29,33,34,36,40,42,45,46,47,49,50                                                                   |
| SEF4MOTIFGM7S                 | ATTTTA           | Element found in 5' upstream region of $\beta$ -conglycinin gene                                                                      | All except CarB3_3                                                                                                                                    |
| NODCON1GM/NODCON2GM           | AAAGAT/CTCT<br>T | One of two putative nodulin consensus sequences                                                                                       | All                                                                                                                                                   |
| OSE1ROOTNODULE/OSE2ROOTNODULE | AAAGAT/CTCT<br>T | Found in the promoters of genes expressed in the infected cells of root nodules                                                       | All                                                                                                                                                   |
| WUSATAg                       | TTAATGG          | WUSATAg Target sequence of WUS in the intron of <i>AGAMOUS</i> gene in <i>Arabidopsis</i>                                             | CaB3_1,5,9,11,12,13,14,21,23,25,26,29,30,44,47,50,51                                                                                                  |
