# Supplementary material
Source: PubMed Central journal article supplement (PMC6710316)
Supplement: 13205_2019_1875_MOESM10_ESM.pdf [file 13205_2019_1875_MOESM10_ESM.pdf]

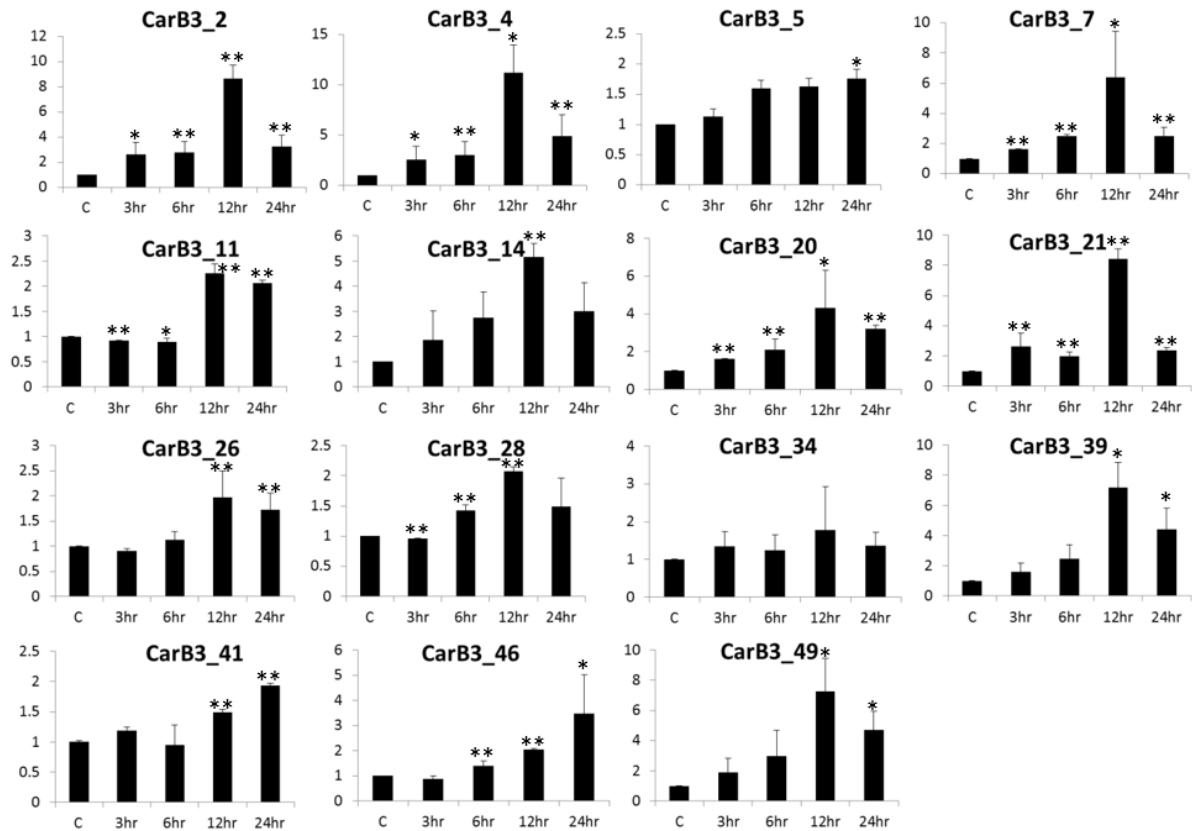

**Online Resource 10:** Expression analysis of 15 selected CarB3 genes in response to ABA (100  $\mu$ M) treatment at different time points through qRT-PCR. Values on Y-axis denote relative expression values. Error bars indicate standard deviation ( $\pm$ SD) of three biological replicates each calculated from three technical replicates. Asterisks indicate significant difference between control and other treated samples (t test, \*P<0.05, \*\*P<0.01).
